# Supplementary material for: Combinatorial transient gene expression strategies to enhance terpenoid production in plants
Source: Front Plant Sci. 2022 Dec 13;13:1034893. doi: 10.3389/fpls.2022.1034893 (PMC9793405; doi:10.3389/fpls.2022.1034893)
Supplement: Supplementary file 2 [file DataSheet_2.xlsx]

## Sheet: MEP
	Well	Fluor	Target	Content	Sample	Biological Set Name	Cq	Cq Mean	Starting Quantity (SQ)	Log Starting Quantity	SQ Mean	SQ Std. Dev	Set Point	Well Note
	A01	SYBR	PP2A	Unkn	WT		21.9432	21.9432				0	60
	A02	SYBR	PP2A	Unkn	WT		21.5458	21.5458				0	60
	A03	SYBR	PP2A	Unkn	WT		21.5202	21.5202				0	60
	A04	SYBR	PP2A	Unkn	Agro		19.0311	19.0311				0	60
	A05	SYBR	PP2A	Unkn	Agro		18.9503	18.9503				0	60
	A06	SYBR	PP2A	Unkn	Agro		18.9127	18.9127				0	60
	A07	SYBR	PP2A	Unkn	DXS		20.8734	20.8734				0	60
	A08	SYBR	PP2A	Unkn	DXS		20.8364	20.8364				0	60
	A09	SYBR	PP2A	Unkn	DXS		20.9266	20.9266				0	60
	A10	SYBR	PP2A	Unkn	DXR		20.4986	20.4986				0	60
	A11	SYBR	PP2A	Unkn	DXR		20.565	20.565				0	60
	A12	SYBR	PP2A	Unkn	DXR		20.8492	20.8492				0	60
	B01	SYBR	PP2A	Unkn	CMK		21.0933	21.0933				0	60
	B02	SYBR	PP2A	Unkn	CMK		20.8803	20.8803				0	60
	B03	SYBR	PP2A	Unkn	CMK		20.5464	20.5464				0	60
	B04	SYBR	PP2A	Unkn	IDI		20.5734	20.5734				0	60
	B05	SYBR	PP2A	Unkn	IDI		20.7078	20.7078				0	60
	B06	SYBR	PP2A	Unkn	IDI		20.6382	20.6382				0	60
	B07	SYBR	PP2A	Unkn	GPPS		20.1529	20.1529				0	60
	B08	SYBR	PP2A	Unkn	GPPS		20.0351	20.0351				0	60
	B09	SYBR	PP2A	Unkn	GPPS		20.0002	20.0002				0	60
	B10	SYBR	PP2A	Unkn	LIS		20.1529	20.1529				0	60
	B11	SYBR	PP2A	Unkn	LIS		20.0351	20.0351				0	60
	B12	SYBR	PP2A	Unkn	LIS		20.0002	20.0002				0	60
	C01	SYBR	DXS	Unkn	WT		21.9755	21.9755				0	60
	C02	SYBR	DXS	Unkn	WT		21.5023	21.5023				0	60
	C03	SYBR	DXS	Unkn	WT		21.5866	21.5866				0	60
	C04	SYBR	DXS	Unkn	Agro		19.2272	19.2272				0	60
	C05	SYBR	DXS	Unkn	Agro		19.391	19.391				0	60
	C06	SYBR	DXS	Unkn	Agro		19.4303	19.4303				0	60
	C07	SYBR	DXS	Unkn	DXS		16.086	16.086				0	60
	C08	SYBR	DXS	Unkn	DXS		15.9349	15.9349				0	60
	C09	SYBR	DXS	Unkn	DXS		16.0844	16.0844				0	60
	C10	SYBR	DXR	Unkn	WT		21.3641	21.3641				0	60
	C11	SYBR	DXR	Unkn	WT		21.4551	21.4551				0	60
	C12	SYBR	DXR	Unkn	WT		21.7869	21.7869				0	60
	D01	SYBR	DXR	Unkn	Agro		20.8764	20.8764				0	60
	D02	SYBR	DXR	Unkn	Agro		20.5324	20.5324				0	60
	D03	SYBR	DXR	Unkn	Agro		20.5109	20.5109				0	60
	D04	SYBR	DXR	Unkn	DXR		18.4447	18.4447				0	60
	D05	SYBR	DXR	Unkn	DXR		18.3558	18.3558				0	60
	D06	SYBR	DXR	Unkn	DXR		18.28	18.28				0	60
	D07	SYBR	CMK	Unkn	WT		24.7149	24.7149				0	60
	D08	SYBR	CMK	Unkn	WT		24.8982	24.8982				0	60
	D09	SYBR	CMK	Unkn	WT		24.8898	24.8898				0	60
	D10	SYBR	CMK	Unkn	Agro		24.4484	24.4484				0	60
	D11	SYBR	CMK	Unkn	Agro		24.6087	24.6087				0	60
	D12	SYBR	CMK	Unkn	Agro		24.5797	24.5797				0	60
	E01	SYBR	CMK	Unkn	CMK		17.3909	17.3909				0	60
	E02	SYBR	CMK	Unkn	CMK		17.1548	17.1548				0	60
	E03	SYBR	CMK	Unkn	CMK		16.9938	16.9938				0	60
	E04	SYBR	IDI	Unkn	WT		20.8417	20.8417				0	60
	E05	SYBR	IDI	Unkn	WT		20.7977	20.7977				0	60
	E06	SYBR	IDI	Unkn	WT		21.0123	21.0123				0	60
	E07	SYBR	IDI	Unkn	Agro		19.3794	19.3794				0	60
	E08	SYBR	IDI	Unkn	Agro		19.275	19.275				0	60
	E09	SYBR	IDI	Unkn	Agro		19.2328	19.2328				0	60
	E10	SYBR	IDI	Unkn	IDI		14.0774	14.0774				0	60
	E11	SYBR	IDI	Unkn	IDI		14.0258	14.0258				0	60
	E12	SYBR	IDI	Unkn	IDI		14.2185	14.2185				0	60
	F01	SYBR	GPPS	Unkn	WT		24.4229	24.4229				0	60
	F02	SYBR	GPPS	Unkn	WT		24.1878	24.1878				0	60
	F03	SYBR	GPPS	Unkn	WT		24.1515	24.1515				0	60
	F04	SYBR	GPPS	Unkn	Agro		22.2972	22.2972				0	60
	F05	SYBR	GPPS	Unkn	Agro		22.1518	22.1518				0	60
	F06	SYBR	GPPS	Unkn	Agro		22.0886	22.0886				0	60
	F07	SYBR	GPPS	Unkn	GPPS		14.0853	14.0853				0	60
	F08	SYBR	GPPS	Unkn	GPPS		13.9756	13.9756				0	60
	F09	SYBR	GPPS	Unkn	GPPS		13.9442	13.9442				0	60
	F10	SYBR	LIS	Unkn	WT		23.2151	23.2151				0	60
	F11	SYBR	LIS	Unkn	WT		23.0681	23.0681				0	60
	F12	SYBR	LIS	Unkn	WT		23.1584	23.1584				0	60
	G01	SYBR	LIS	Unkn	Agro		22.8434	22.8434				0	60
	G02	SYBR	LIS	Unkn	Agro		23.0571	23.0571				0	60
	G03	SYBR	LIS	Unkn	Agro		23.0548	23.0548				0	60
	G04	SYBR	LIS	Unkn	LIS		19.6587	19.6587				0	60
	G05	SYBR	LIS	Unkn	LIS		19.9777	19.9777				0	60
	G06	SYBR	LIS	Unkn	LIS		20.312	20.312				0	60
	H06	SYBR	PP2A	Neg Ctrl				0			0	0	60
	H07	SYBR	DXS	Neg Ctrl				0			0	0	60
	H08	SYBR	DXR	Neg Ctrl				0				0	60
	H09	SYBR	CMK	Neg Ctrl				0			0	0	60
	H10	SYBR	IDI	Neg Ctrl				0				0	60
	H11	SYBR	GPPS	Neg Ctrl				0				0	60
	H12	SYBR	LIS	Neg Ctrl				0				0	60

## Sheet: MVA
	Well	Fluor	Target	Content	Sample	Biological Set Name	Cq	Cq Mean	Starting Quantity (SQ)	Log Starting Quantity	SQ Mean	SQ Std. Dev	Set Point	Well Note
	A01	SYBR	PP2A	Unkn	WT		23	23				0	60
	A02	SYBR	PP2A	Unkn	WT		22.82	22.82				0	60
	A03	SYBR	PP2A	Unkn	WT		22.84	22.84				0	60
	A04	SYBR	PP2A	Unkn	Agro		21.16	21.16				0	60
	A05	SYBR	PP2A	Unkn	Agro		21.09	21.09				0	60
	A06	SYBR	PP2A	Unkn	Agro		21.19	21.19				0	60
	A07	SYBR	PP2A	Unkn	AAT		22.05	22.05				0	60
	A08	SYBR	PP2A	Unkn	AAT		21.91	21.91				0	60
	A09	SYBR	PP2A	Unkn	AAT		21.8	21.8				0	60
	A10	SYBR	PP2A	Unkn	HMGR		22.07	22.07				0	60
	A11	SYBR	PP2A	Unkn	HMGR		21.99	21.99				0	60
	A12	SYBR	PP2A	Unkn	HMGR		21.91	21.91				0	60
	B01	SYBR	PP2A	Unkn	FPS		22.41	22.41				0	60
	B02	SYBR	PP2A	Unkn	FPS		22.19	22.19				0	60
	B03	SYBR	PP2A	Unkn	FPS		22.25	22.25				0	60
	B04	SYBR	PP2A	Unkn	GAS		22.19	22.19				0	60
	B05	SYBR	PP2A	Unkn	GAS		22.08	22.08				0	60
	B06	SYBR	PP2A	Unkn	GAS		22.1	22.1				0	60
	B07	SYBR	PP2A	Unkn	GAO		22.54	22.54				0	60
	B08	SYBR	PP2A	Unkn	GAO		22.47	22.47				0	60
	B09	SYBR	PP2A	Unkn	GAO		22.42	22.42				0	60
	B10	SYBR	PP2A	Unkn	COS		22.25	22.25				0	60
	B11	SYBR	PP2A	Unkn	COS		22.03	22.03				0	60
	B12	SYBR	PP2A	Unkn	COS		22.08	22.08				0	60
	C01	SYBR	AAT	Unkn	WT		38.74	38.74				0	60
	C02	SYBR	AAT	Unkn	WT		38.12	38.12				0	60
	C03	SYBR	AAT	Unkn	WT		39.02	39.02				0	60
	C04	SYBR	AAT	Unkn	Agro		35.43	35.43				0	60
	C05	SYBR	AAT	Unkn	Agro		34.58	34.58				0	60
	C06	SYBR	AAT	Unkn	Agro		36.19	36.19				0	60
	C07	SYBR	AAT	Unkn	AAT		19.37	19.37				0	60
	C08	SYBR	AAT	Unkn	AAT		19.29	19.29				0	60
	C09	SYBR	AAT	Unkn	AAT		19.21	19.21				0	60
	C10	SYBR	HMGR	Unkn	WT		28.77	28.77				0	60
	C11	SYBR	HMGR	Unkn	WT		28.7	28.7				0	60
	C12	SYBR	HMGR	Unkn	WT		29.15	29.15				0	60
	D01	SYBR	HMGR	Unkn	Agro		24.98	24.98				0	60
	D02	SYBR	HMGR	Unkn	Agro		25.12	25.12				0	60
	D03	SYBR	HMGR	Unkn	Agro		24.92	24.92				0	60
	D04	SYBR	HMGR	Unkn	HMGR		17.07	17.07				0	60
	D05	SYBR	HMGR	Unkn	HMGR		17.02	17.02				0	60
	D06	SYBR	HMGR	Unkn	HMGR		16.94	16.94				0	60
	D07	SYBR	FPS	Unkn	WT		35.46	35.46				0	60
	D08	SYBR	FPS	Unkn	WT		37.14	37.14				0	60
	D09	SYBR	FPS	Unkn	WT		36.45	36.45				0	60
	D10	SYBR	FPS	Unkn	Agro		35.84	35.84				0	60
	D11	SYBR	FPS	Unkn	Agro		34.3	34.3				0	60
	D12	SYBR	FPS	Unkn	Agro		34.18	34.18				0	60
	E01	SYBR	FPS	Unkn	FPS		18.15	18.15				0	60
	E02	SYBR	FPS	Unkn	FPS		18.12	18.12				0	60
	E03	SYBR	FPS	Unkn	FPS		18.22	18.22				0	60
	E04	SYBR	GAS	Unkn	WT		34.31	34.31				0	60
	E05	SYBR	GAS	Unkn	WT		32.88	32.88				0	60
	E06	SYBR	GAS	Unkn	WT		32.7	32.7				0	60
	E07	SYBR	GAS	Unkn	Agro		35.35	35.35				0	60
	E08	SYBR	GAS	Unkn	Agro		32.53	32.53				0	60
	E09	SYBR	GAS	Unkn	Agro		32.98	32.98				0	60
	E10	SYBR	GAS	Unkn	GAS		18.13	18.13				0	60
	E11	SYBR	GAS	Unkn	GAS		18.04	18.04				0	60
	E12	SYBR	GAS	Unkn	GAS		18.11	18.11				0	60
	F01	SYBR	GAO	Unkn	WT		36.07	36.07				0	60
	F02	SYBR	GAO	Unkn	WT		36.54	36.54				0	60
	F03	SYBR	GAO	Unkn	WT		36.19	36.19				0	60
	F04	SYBR	GAO	Unkn	Agro		39.12	39.12				0	60
	F05	SYBR	GAO	Unkn	Agro		39.47	39.47				0	60
	F06	SYBR	GAO	Unkn	Agro		40.14	40.14				0	60
	F07	SYBR	GAO	Unkn	GAO		18.16	18.16				0	60
	F08	SYBR	GAO	Unkn	GAO		18.16	18.16				0	60
	F09	SYBR	GAO	Unkn	GAO		18.19	18.19				0	60
	F10	SYBR	COS	Unkn	WT		36.41	36.41				0	60
	F11	SYBR	COS	Unkn	WT		37.45	37.45				0	60
	F12	SYBR	COS	Unkn	WT		37.9	37.9				0	60
	G01	SYBR	COS	Unkn	Agro		33.03	33.03				0	60
	G02	SYBR	COS	Unkn	Agro		33.49	33.49				0	60
	G03	SYBR	COS	Unkn	Agro		33.21	33.21				0	60
	G04	SYBR	COS	Unkn	COS		16.4	16.4				0	60
	G05	SYBR	COS	Unkn	COS		16.32	16.32				0	60
	G06	SYBR	COS	Unkn	COS		16.35	16.35				0	60
	H06	SYBR	PP2A	Neg Ctrl				0			0	0	60
	H07	SYBR	AAT	Neg Ctrl				0			0	0	60
	H08	SYBR	HMGR	Neg Ctrl				0				0	60
	H09	SYBR	FPS	Neg Ctrl				0			0	0	60
	H10	SYBR	GAS	Neg Ctrl				0				0	60
	H11	SYBR	GAO	Neg Ctrl				0				0	60
	H12	SYBR	COS	Neg Ctrl				0				0	60

## Sheet: Run Information
File Name	admin_2022-10-12 11-24-55_BR010813.pcrd
Created By User	admin
Notes
ID
Run Started	10/12/2022 02:25:04 UTC
Run Ended	10/12/2022 03:48:05 UTC
Sample Vol	20
Lid Temp	105
Protocol File Name	qRT-Tomato.prcl
Plate Setup File Name	170717.pltd
Base Serial Number	BR010813
Optical Head Serial Number	788BR10611
CFX Maestro Version	5.2.008.0222.
